# Supplementary material for: CDH4 inhibits ferroptosis in oral squamous cell carcinoma cells
Source: PubMed Central journal article supplement (PMC10224206; doi:10.1186/s12903-023-03046-3), 2023-05-27
Supplement: 12903_2023_3046_MOESM1_ESM.pdf [file 12903_2023_3046_MOESM1_ESM.pdf]

Figure 2.

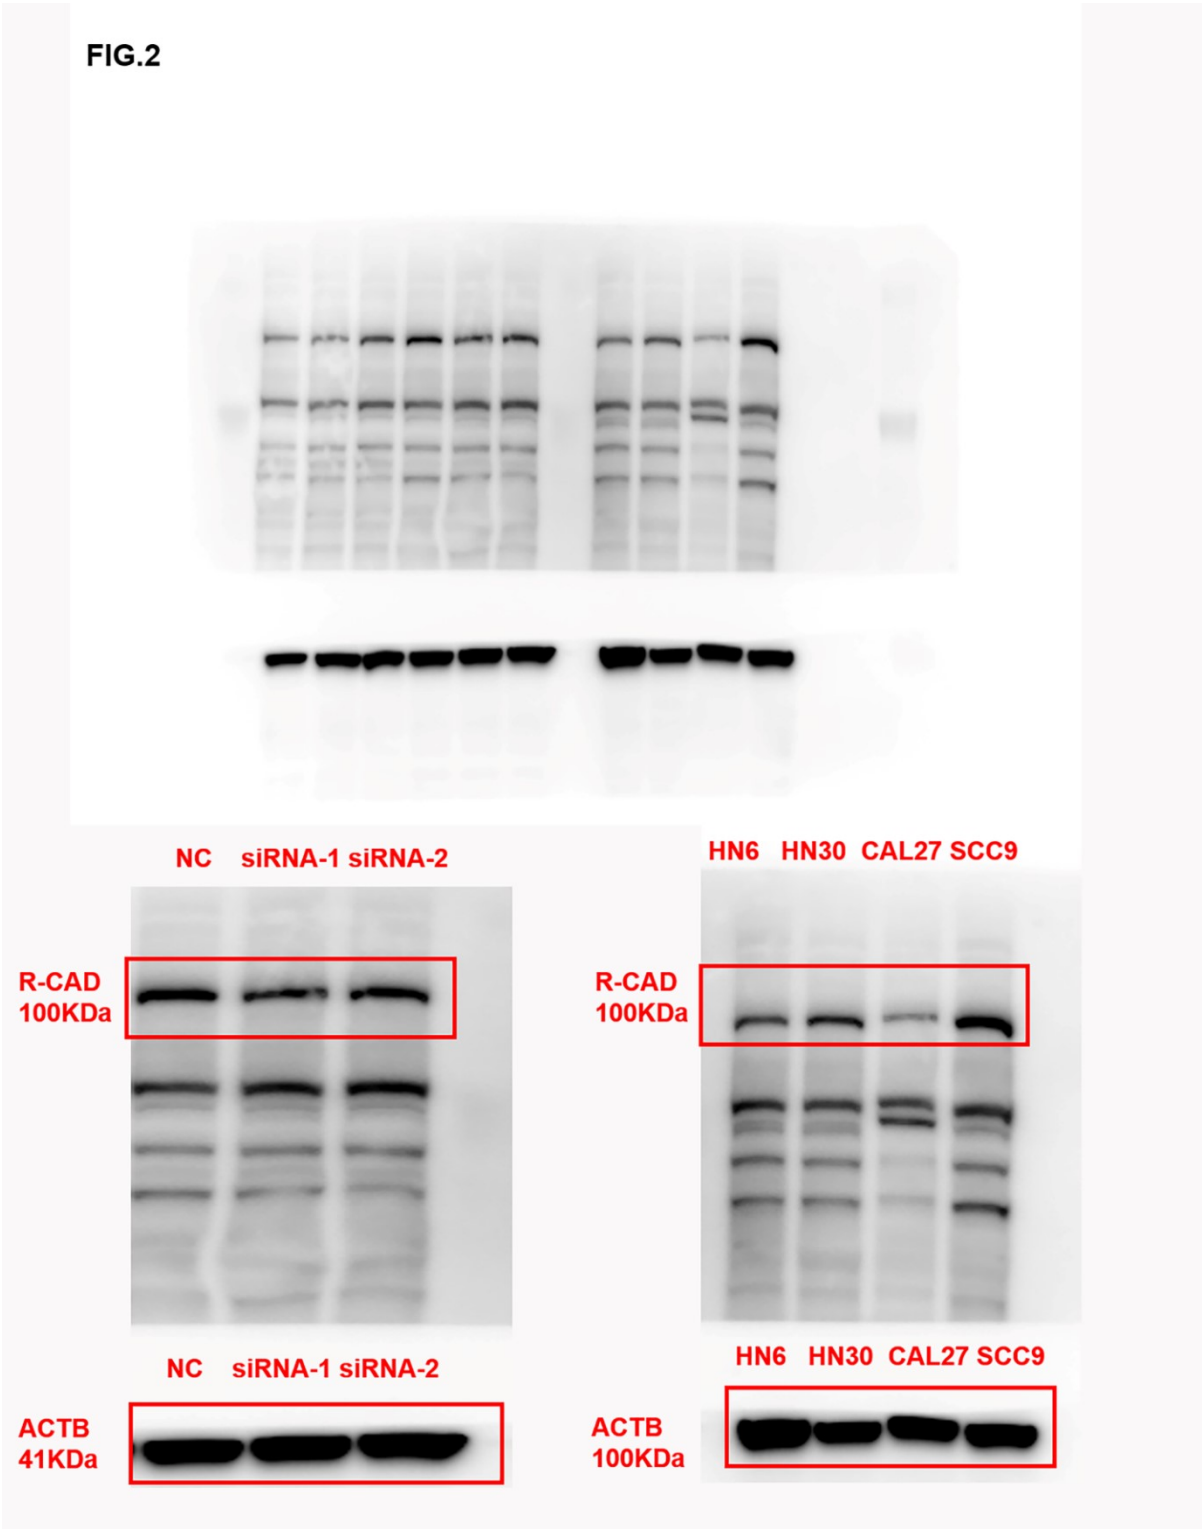

Figure S1. The original Western Blot images for R-Cadherin and ACTB in different cell lines (right, related to Fig 2B) and in HN30 cells (left, related to Fig 2B).

FIG.2

SCC9

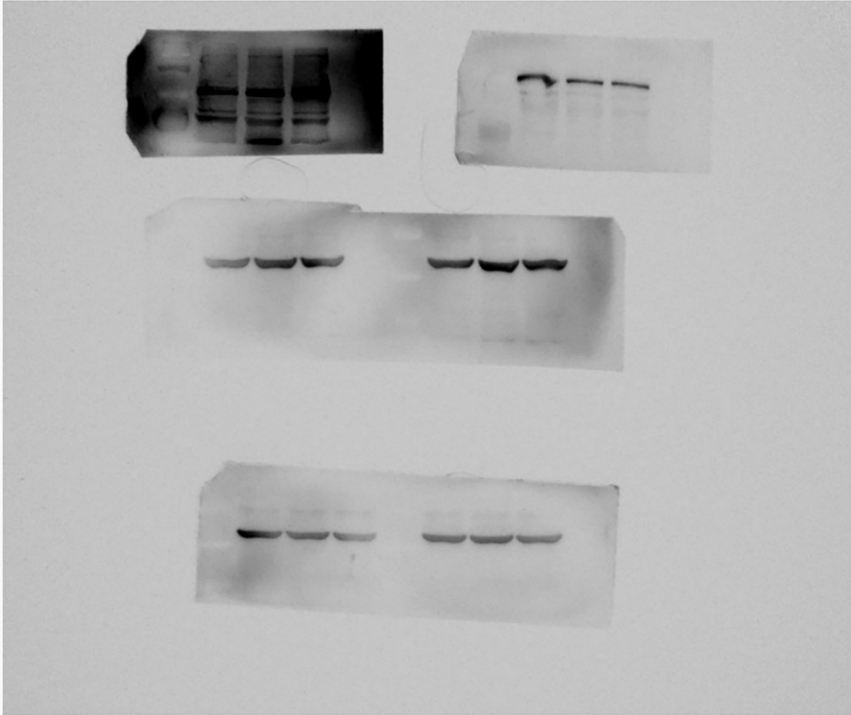

R-CAD  
100KDa

NC siRNA-1 siRNA-2

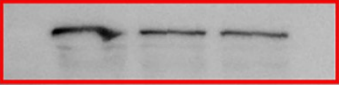

ACTB  
41KDa

NC siRNA-1 siRNA-2

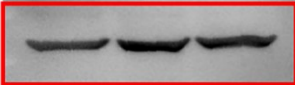

Figure S2. The original Western Blot images for R-Cadeherin and ACTB in SCC9 cells (related to Fig 2F).

FIG.4

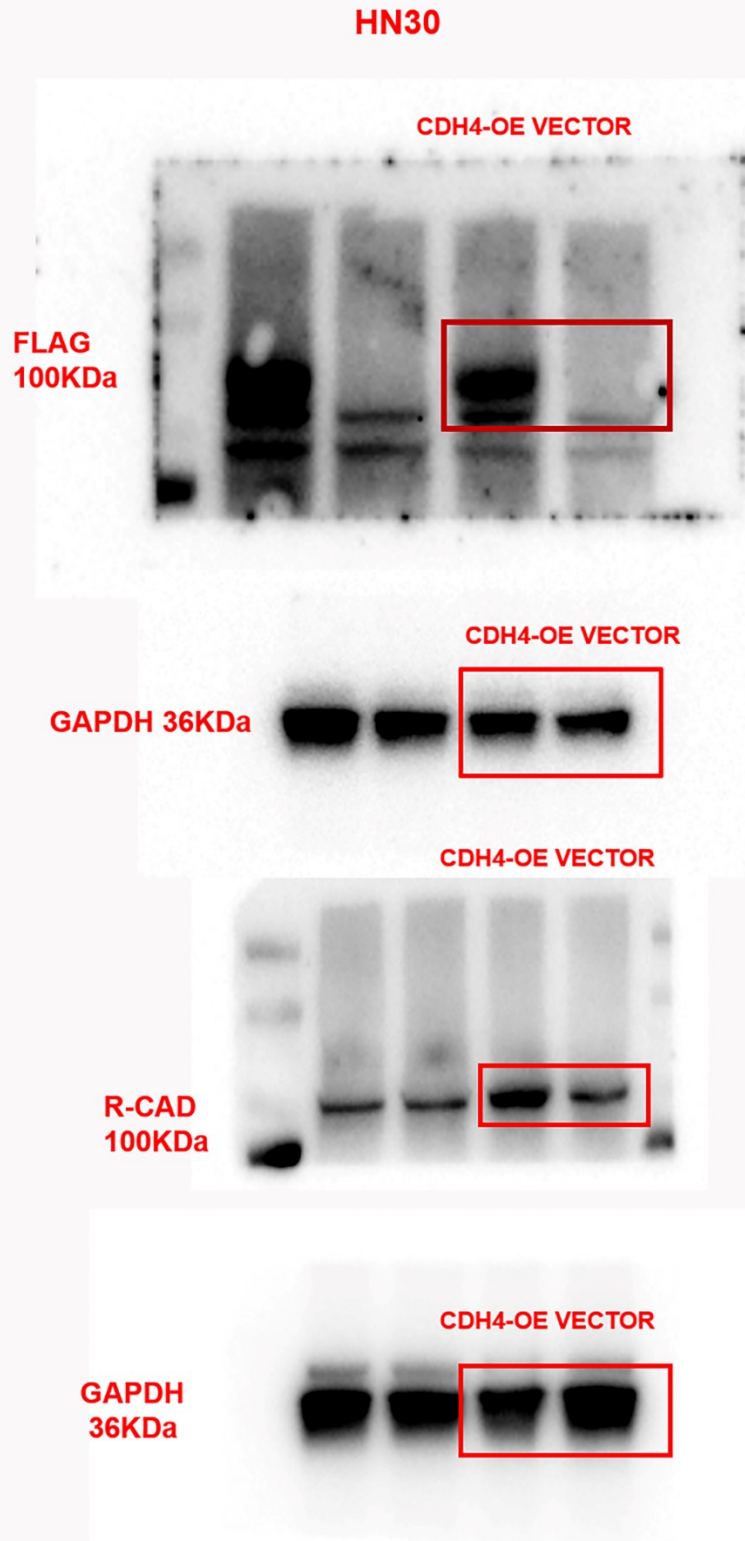

Figure S3. The original Western Blot images for R-Cadeherin and GAPDH in HN30 cells (related to Fig 4A).

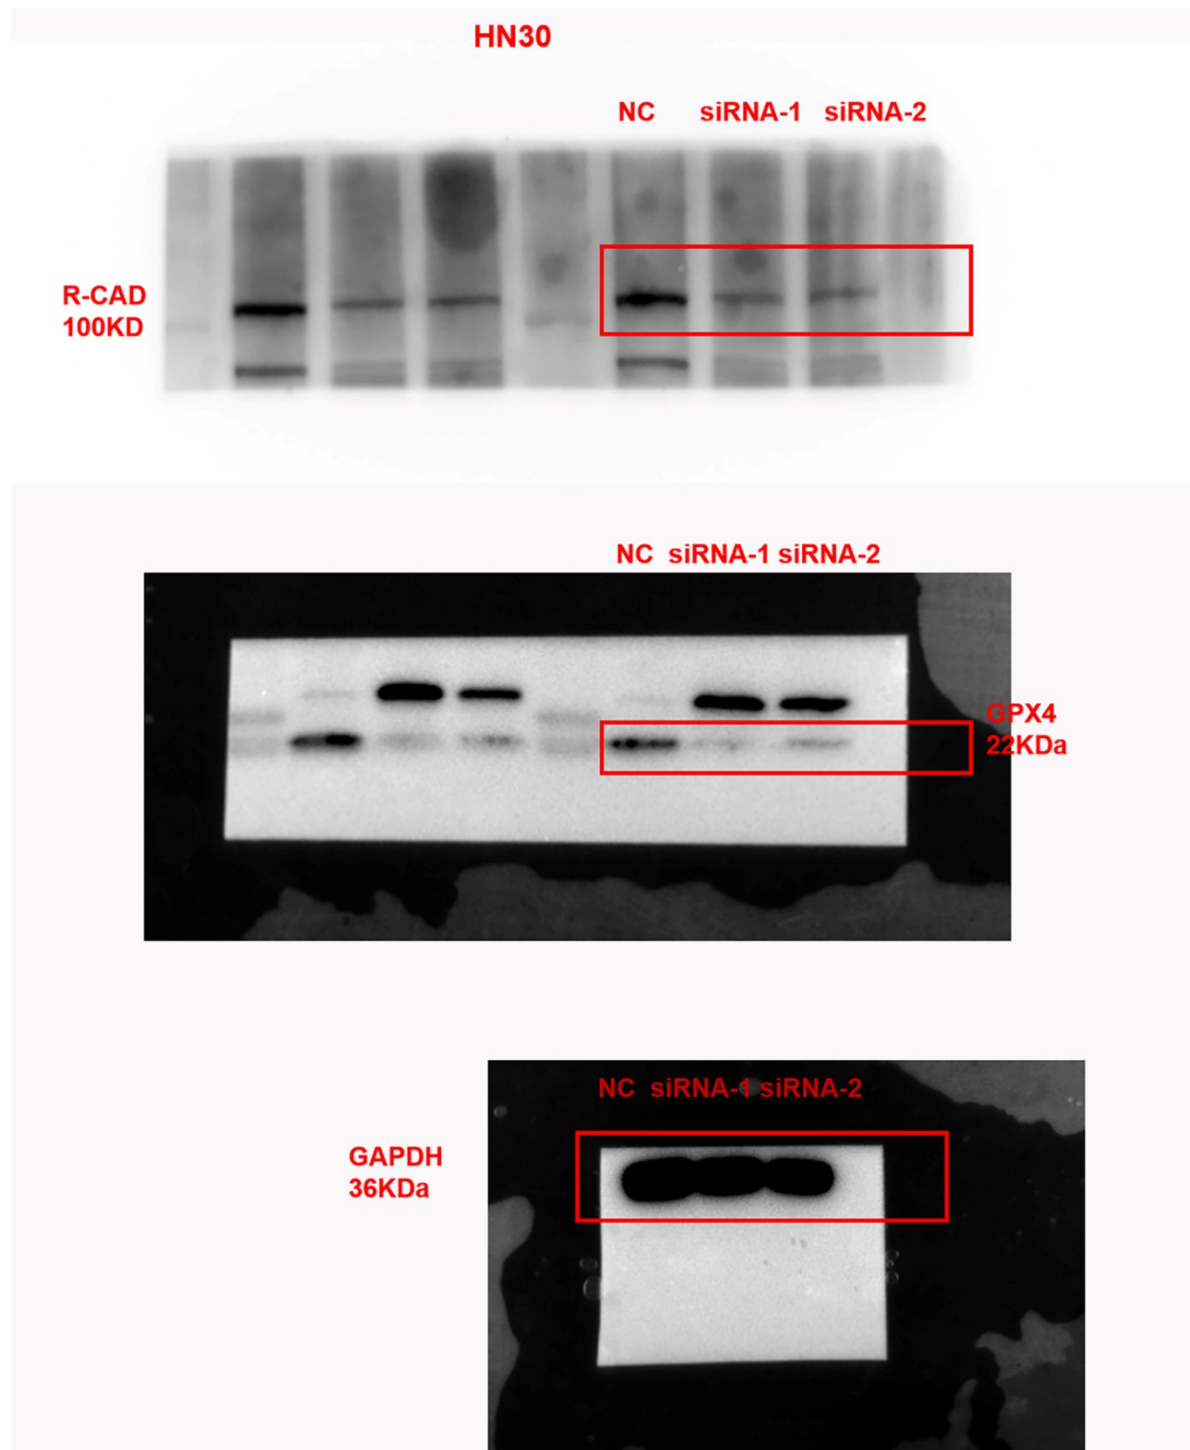

Figure S4. The original Western Blot images for R-Cadherin, GPX4 and GAPDH in HN30 cells (related to Fig 5E).

FIG.5

HN30

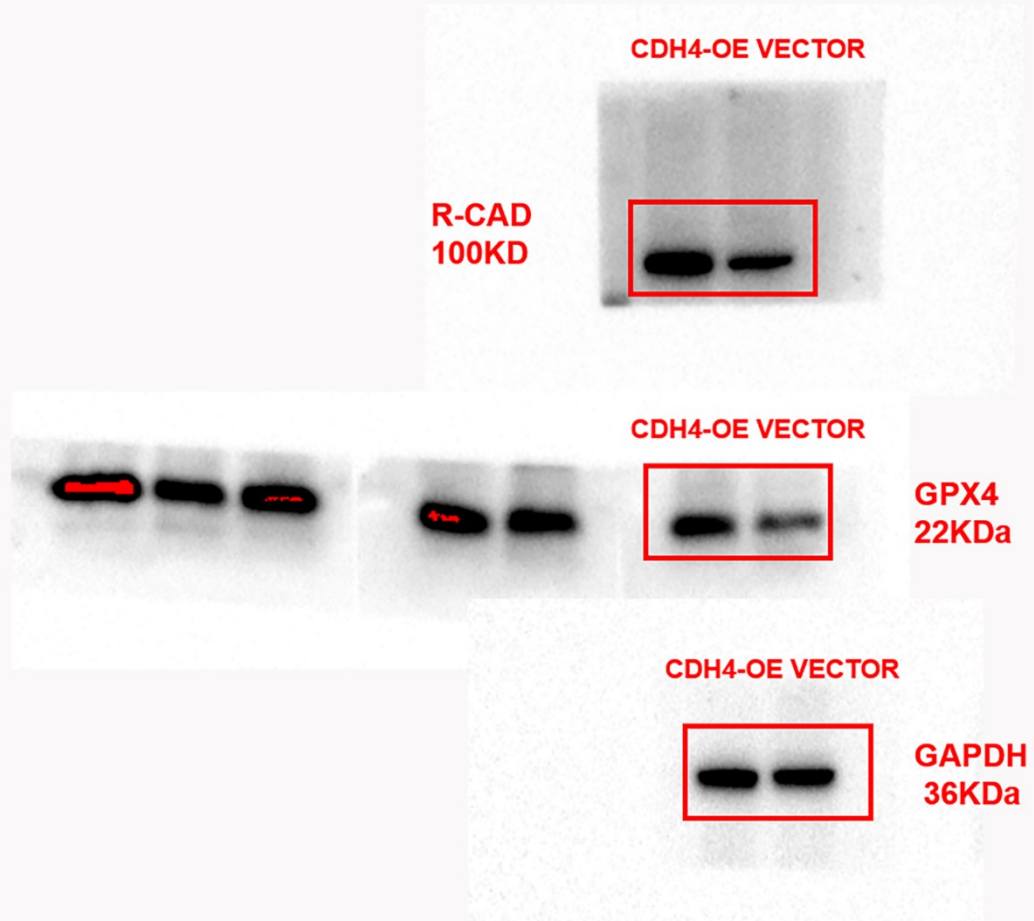

Figure S5. The original Western Blot images for R-Cadherin, GPX4 and GAPDH in HN30 cells (related to Fig 5F).

REPEAT EXPERIMENT

HN30

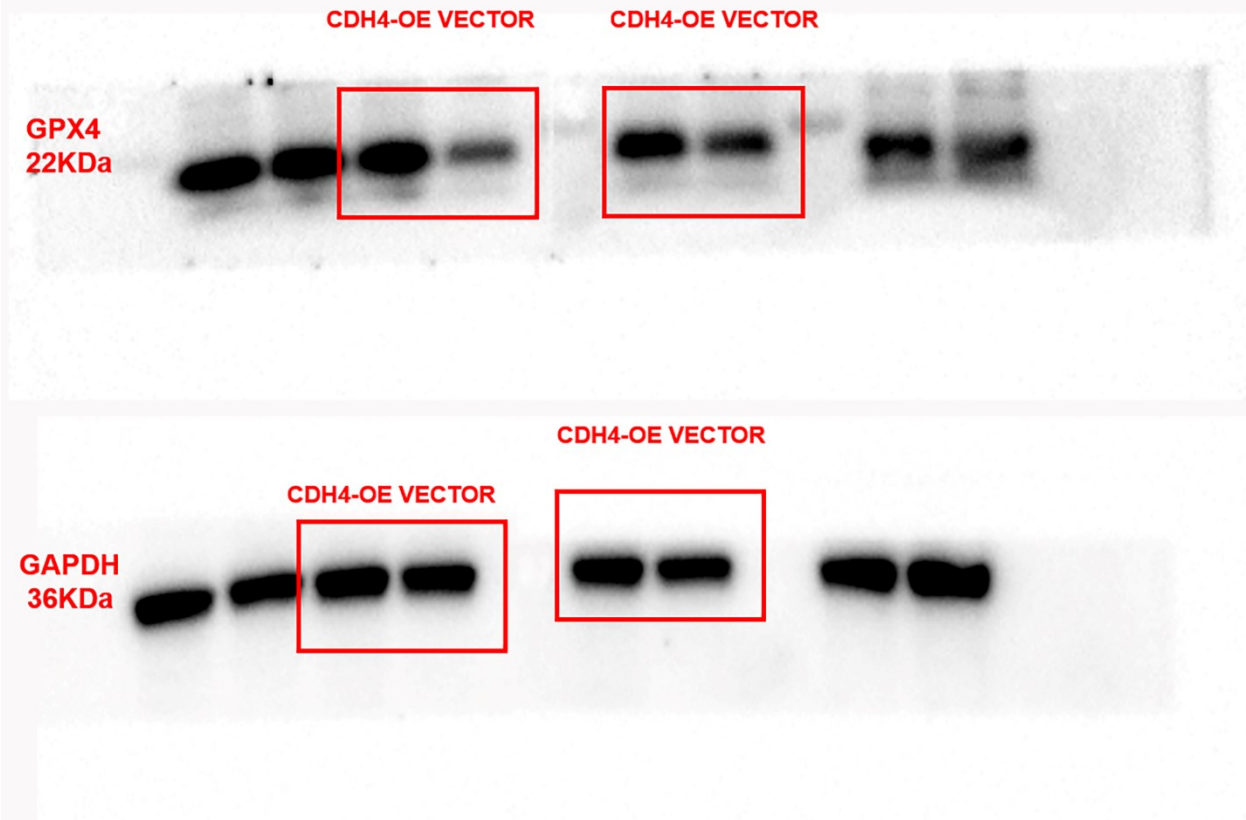

Figure S6. The original Western Blot images of repeat experiments for GPX4 and GAPDH in HN30 cells (related to Fig 5F).

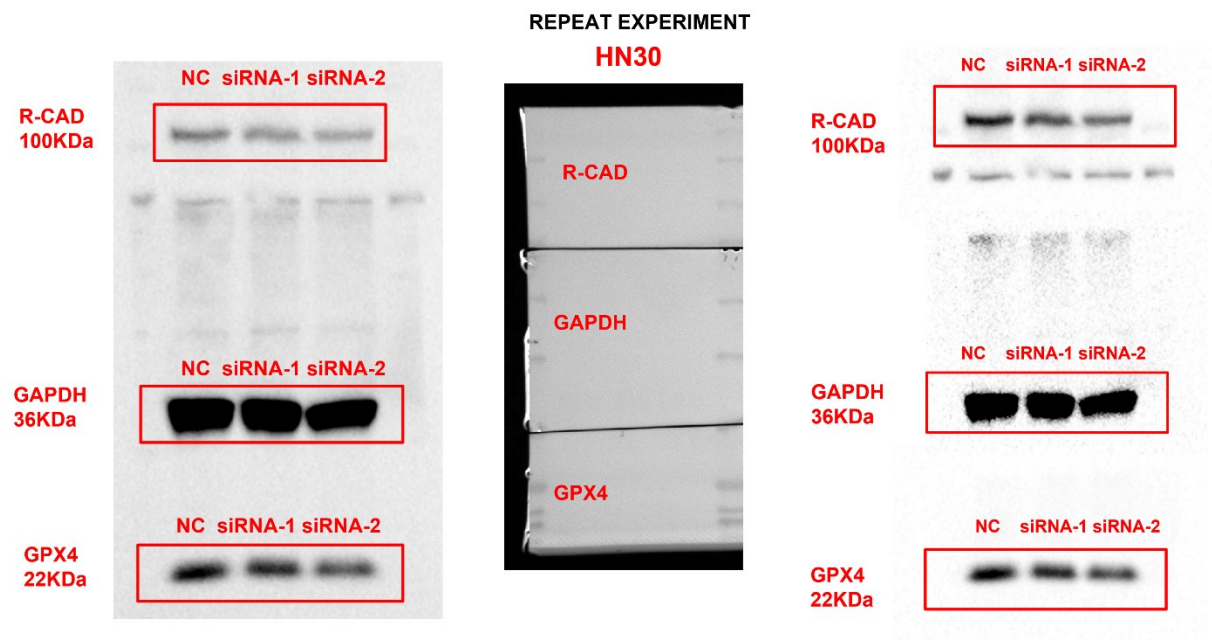

Figure S7. The original Western Blot images of repeat experiments for R-Cad, GPX4 and GAPDH in HN30 cells (related to Fig 5E).

Figure 5, repeated.

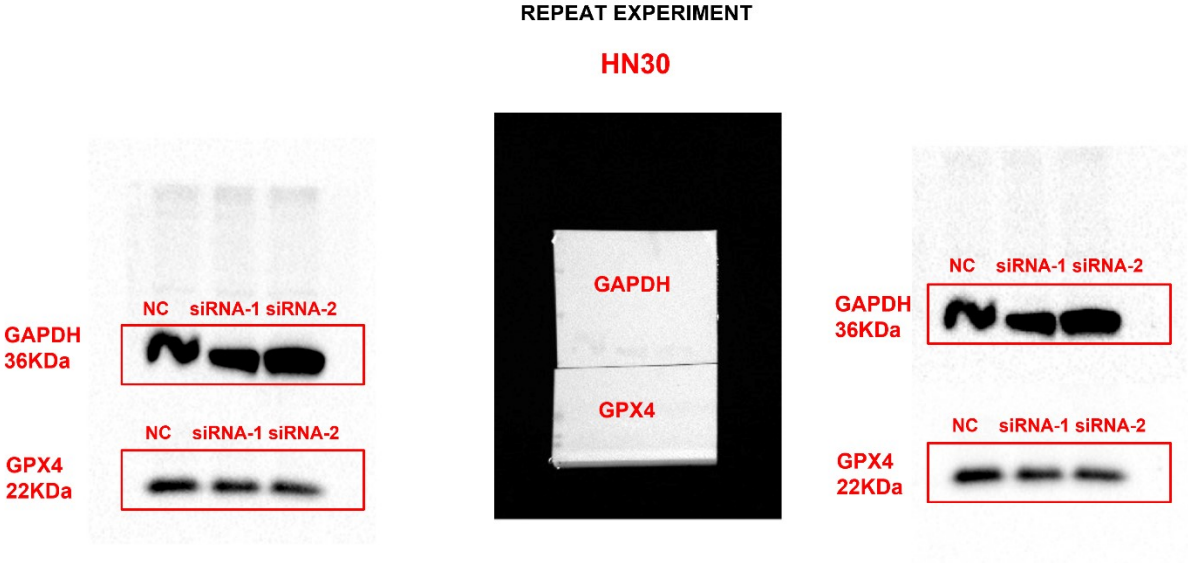

Figure S8. The original Western Blot images of repeat experiments for GPX4 and GAPDH in HN30 cells (related to Fig 5E).



REPEAT EXPERIMENT

HN30

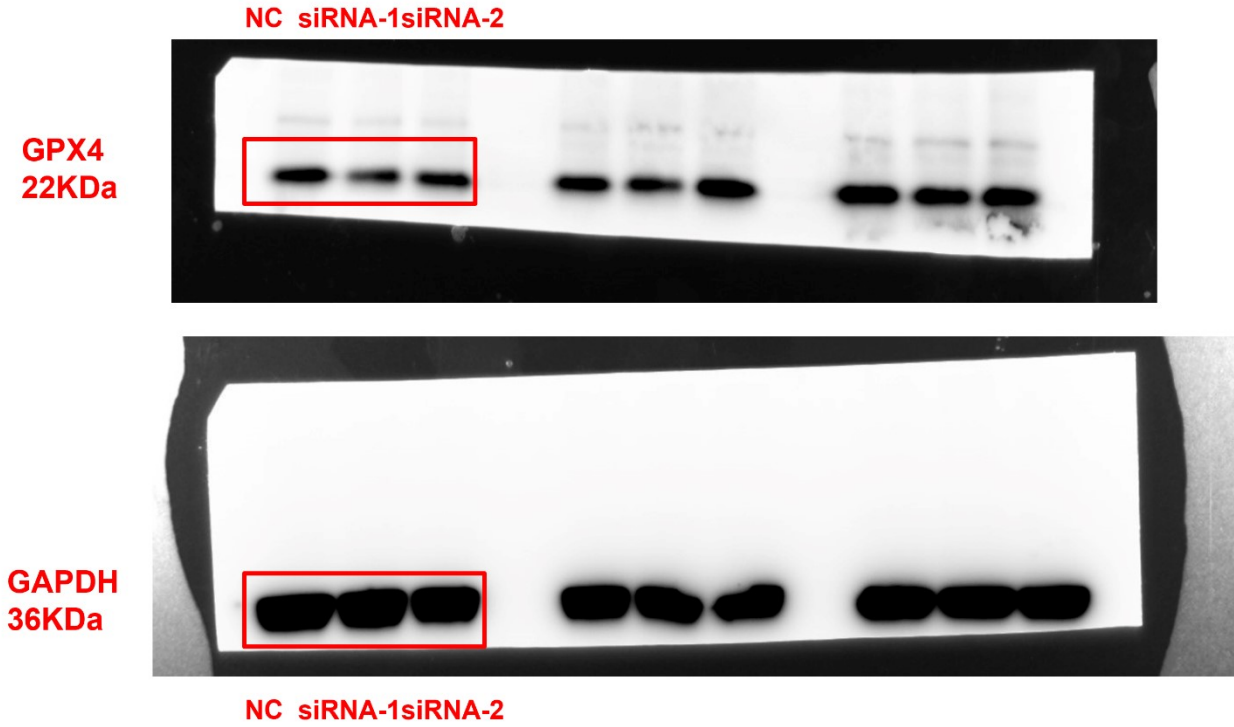

Figure S9. The original Western Blot images of repeat experiments for GPX4 and GAPDH in HN30 cells (related to Fig 5E).
